# Supplementary material for: Targeted therapeutic effect against the breast cancer cell line MCF-7 with a CuFe2O4/silica/cisplatin nanocomposite formulation
Source: PubMed Central journal article supplement (PMC6880833; doi:10.3762/bjnano.10.214), 2019-11-12
Supplement: Beilstein_J_Nanotechnol-10-2217-s001.pdf [file Beilstein_J_Nanotechnol-10-2217-s001.pdf]

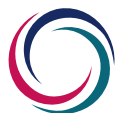

## Supporting Information

for

### **Targeted therapeutic effect against the breast cancer cell line MCF-7 with a $\text{CuFe}_2\text{O}_4$ /silica/cisplatin nanocomposite formulation**

B. Rabindran Jermy, Vijaya Ravinayagam, Widyan A. Alamoudi, Dana Almohazey, Hatim Dafalla, Lina Hussain Allehaibi, Abdulhadi Baykal, Muhammet S. Toprak and Thirunavukkarasu Somanathan

*Beilstein J. Nanotechnol.* **2019**, *10*, 2217–2228. doi:10.3762/bjnano.10.214

## Additional figure

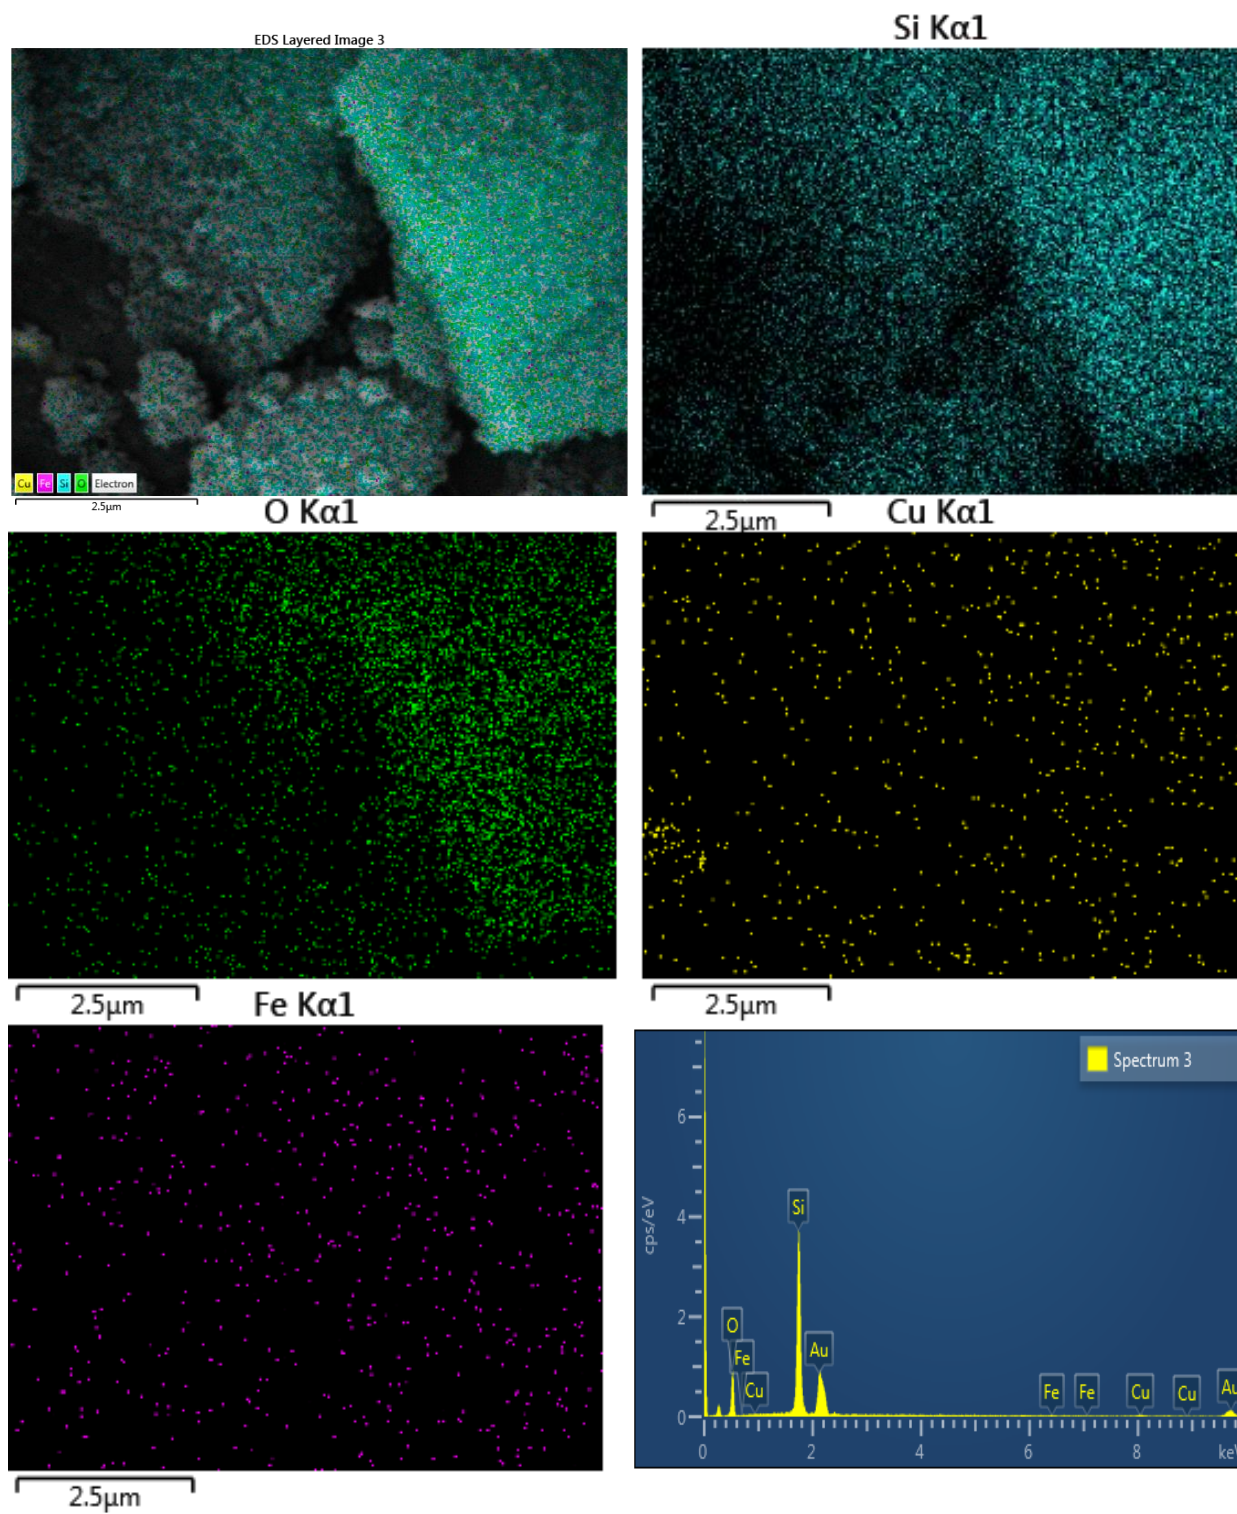

**Figure S1:** SEM-EDX analysis 30% CuFe<sub>2</sub>O<sub>4</sub>/HYPS.
